# Supplementary material for: Synthesis and use of “clickable” bay-region tetrasubstituted perylene tetracarboxylic tetraesters and a perylene monoimide diester as energy acceptors
Source: Royal Society of Chemistry journal article supplement (doi:10.1039/c4nj01565g), 2014-10-22
Supplement: c4nj01565g1.pdf [file c4nj01565g1.pdf]

# New Journal of Chemistry

## Electronic Supplementary Information

### **Synthesis and Use of “Clickable” Bay-region Tetrasubstituted Perylene tetracarboxylicacid tetraesters and a Perylene monoimide diester as Energy Acceptors**

*Edanur Aydin, Bilal Nisanci, Murat Acar, Arif Dastan, and Ozgur Altan  
Bozdemir\**

Department of Chemistry, Ataturk University, Erzurum, 25240, TURKEY

E-mail: oaltanbozdemir@atauni.edu.tr

## UV-Vis Absorption and Fluorescence Spectra:

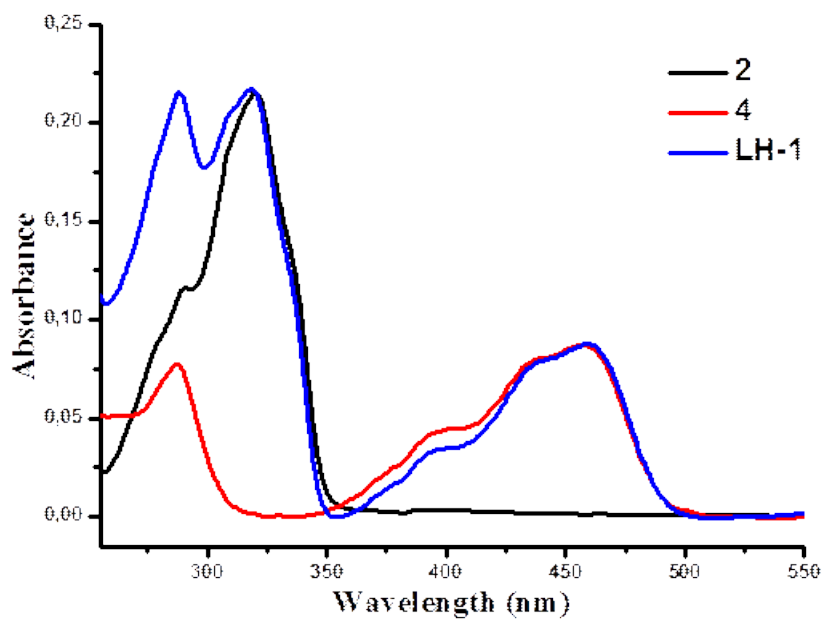

**Fig. S1:** Absorbance spectra of compounds **2**, **4** and **LH-1** in  $\text{CHCl}_3$ . The concentrations of compounds **2** and **4** were adjusted so that they have equal absorbances at 320 nm and 459 nm with **LH-1**.

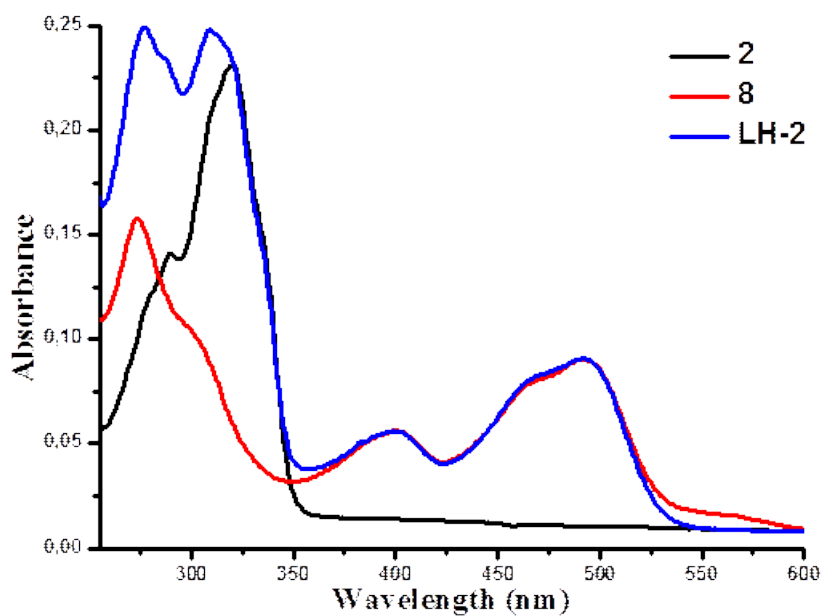

**Fig. S2:** Absorbance spectra of compounds **2**, **8** and **LH-2** in  $\text{CHCl}_3$ . The concentrations of compounds **2** and **8** were adjusted so that they have equal absorbances at 320 nm and 492 nm with **LH-2**.

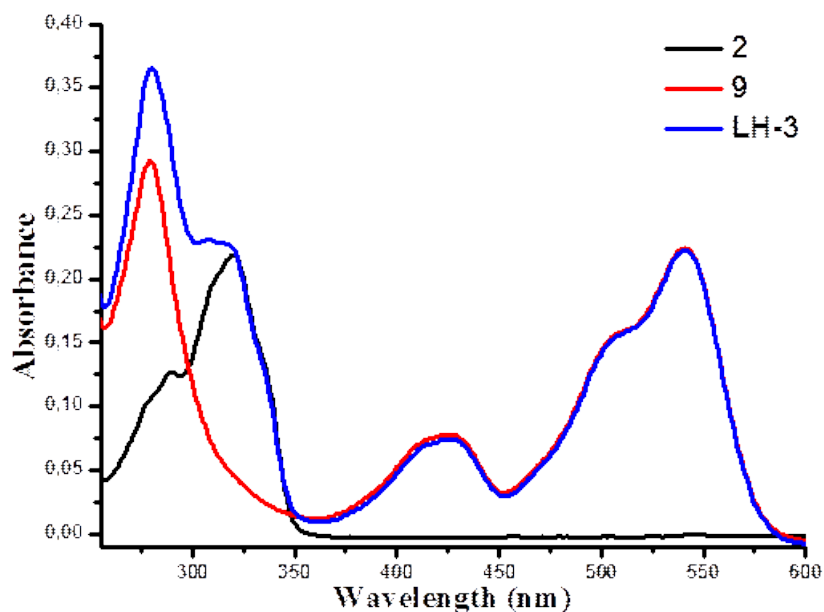

**Fig. S3:** Absorbance spectra of compounds **2**, **9** and **LH-3** in CHCl<sub>3</sub>. The concentrations of compounds **2** and **9** were adjusted so that they have equal absorbances at 320 nm and 540 nm with **LH-3**.

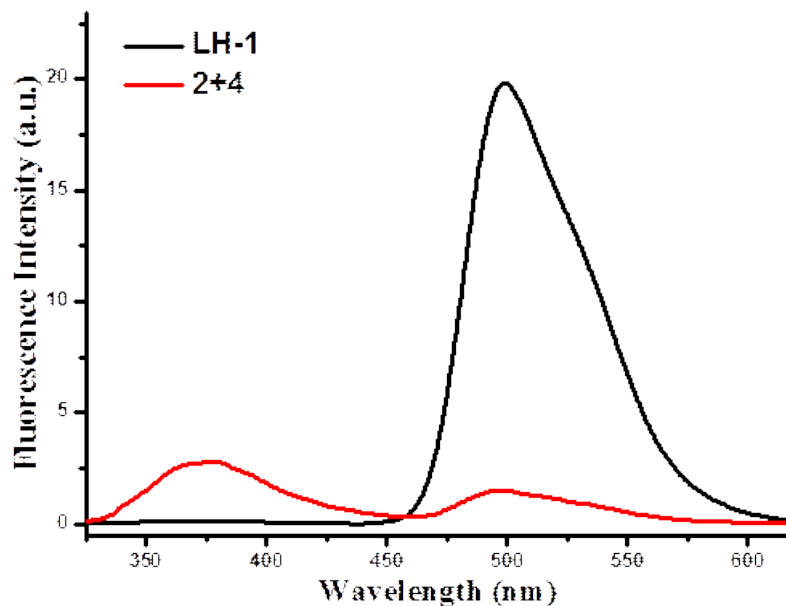

**Fig. S4:** Fluorescence emission spectra of the mixture of compounds **2** and **4**, and **LH-1** upon excitation at 315 nm in CHCl<sub>3</sub>. The concentrations of compounds **2** and **4** in the mixture were adjusted so that they have equal absorbances at 320 nm and 459 nm with **LH-1**.

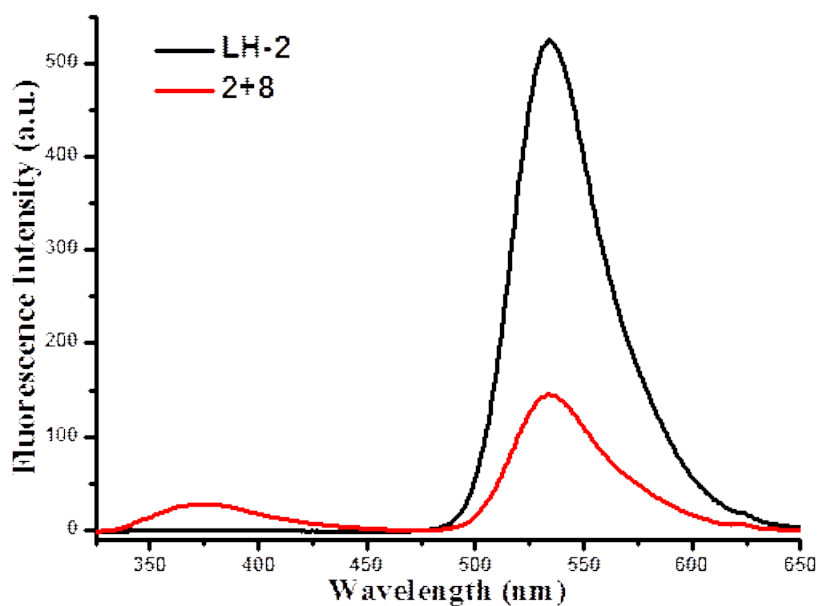

**Fig. S5:** Fluorescence emission spectra of the mixture of compounds **2** and **8**, and **LH-2** upon excitation at 315 nm in  $\text{CHCl}_3$ . The concentrations of compounds **2** and **8** in the mixture were adjusted so that they have equal absorbances at 320 nm and 492 nm with **LH-2**.

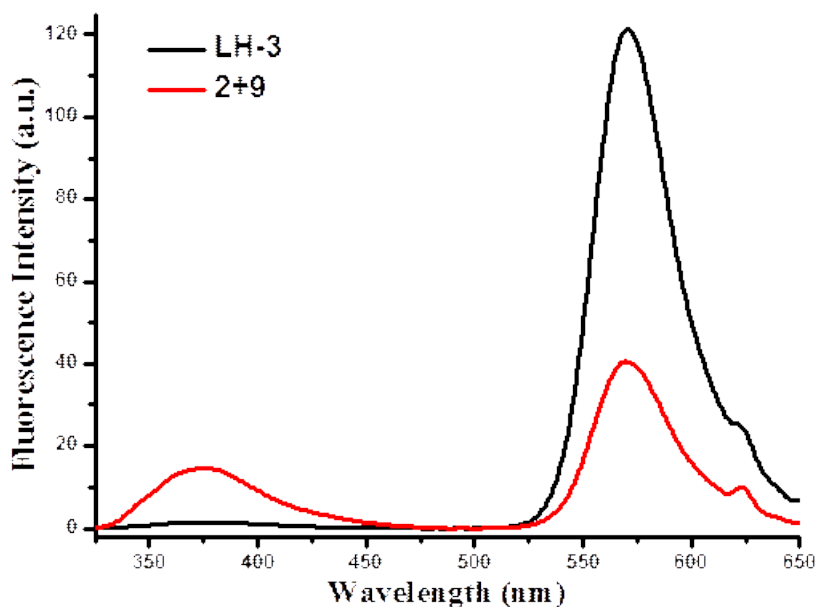

**Fig. S6:** Fluorescence emission spectra of a mixture of compounds **2** and **9**, and **LH-3** upon excitation at 315 nm in  $\text{CHCl}_3$ . The concentrations of compounds **2** and **9** in the mixture were adjusted so that they have equal absorbances at 320 nm and 540 nm with **LH-3**.

# <sup>1</sup>H, <sup>13</sup>C NMR, and HR-MS Spectra:

aad  
Ester tetrakloro

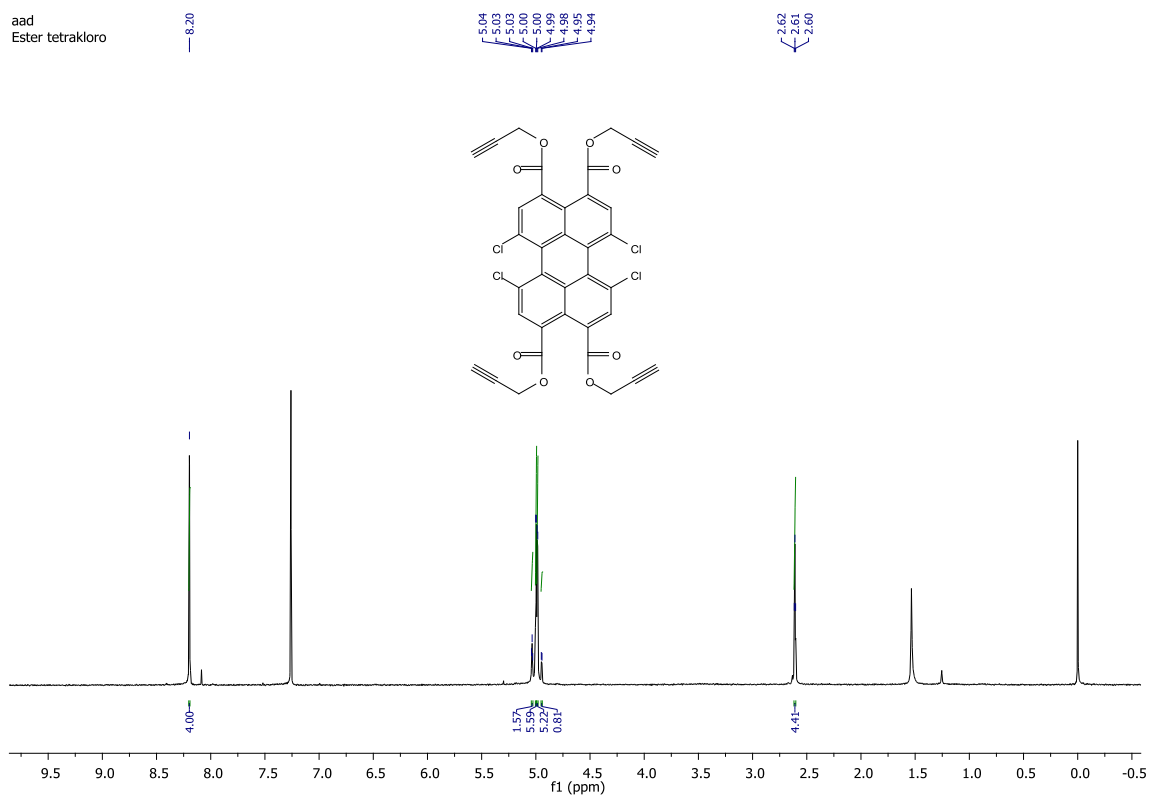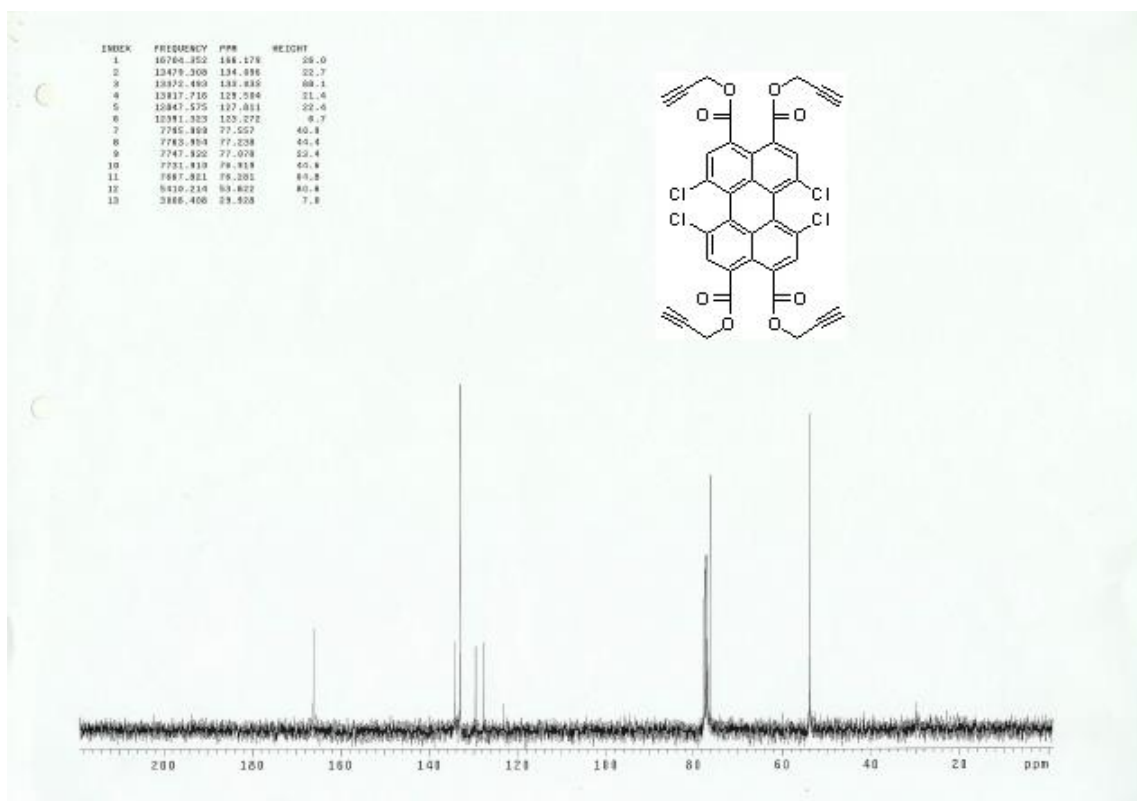

**Fig. S7:** <sup>1</sup>H and <sup>13</sup>C NMR spectra of compound **4**.

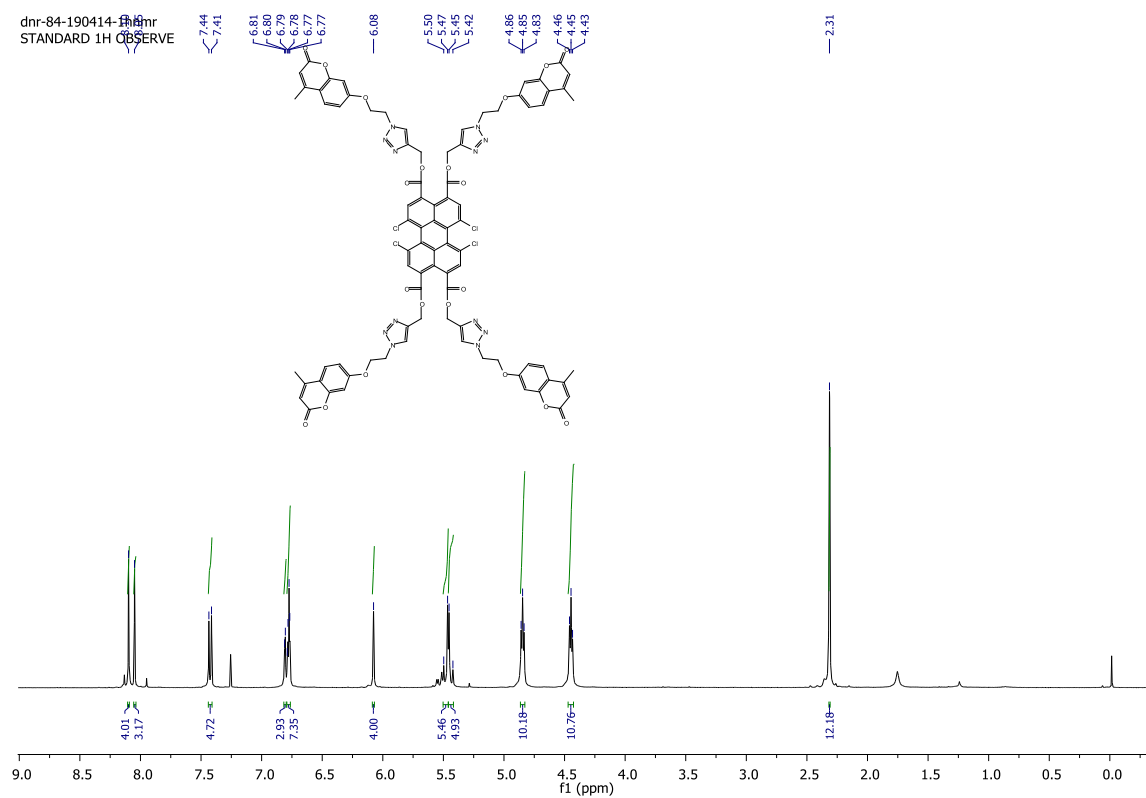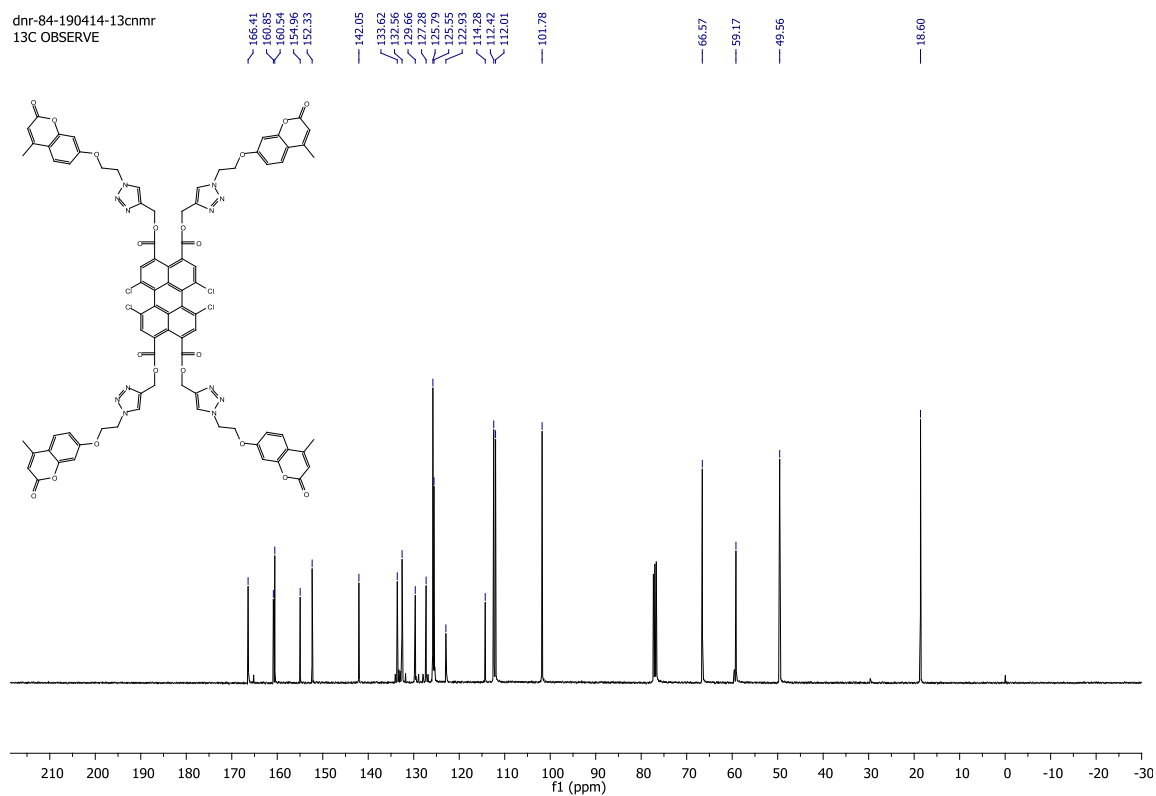

**Fig. S8:**  $^1\text{H}$  and  $^{13}\text{C}$  NMR spectra of **LH-1**.

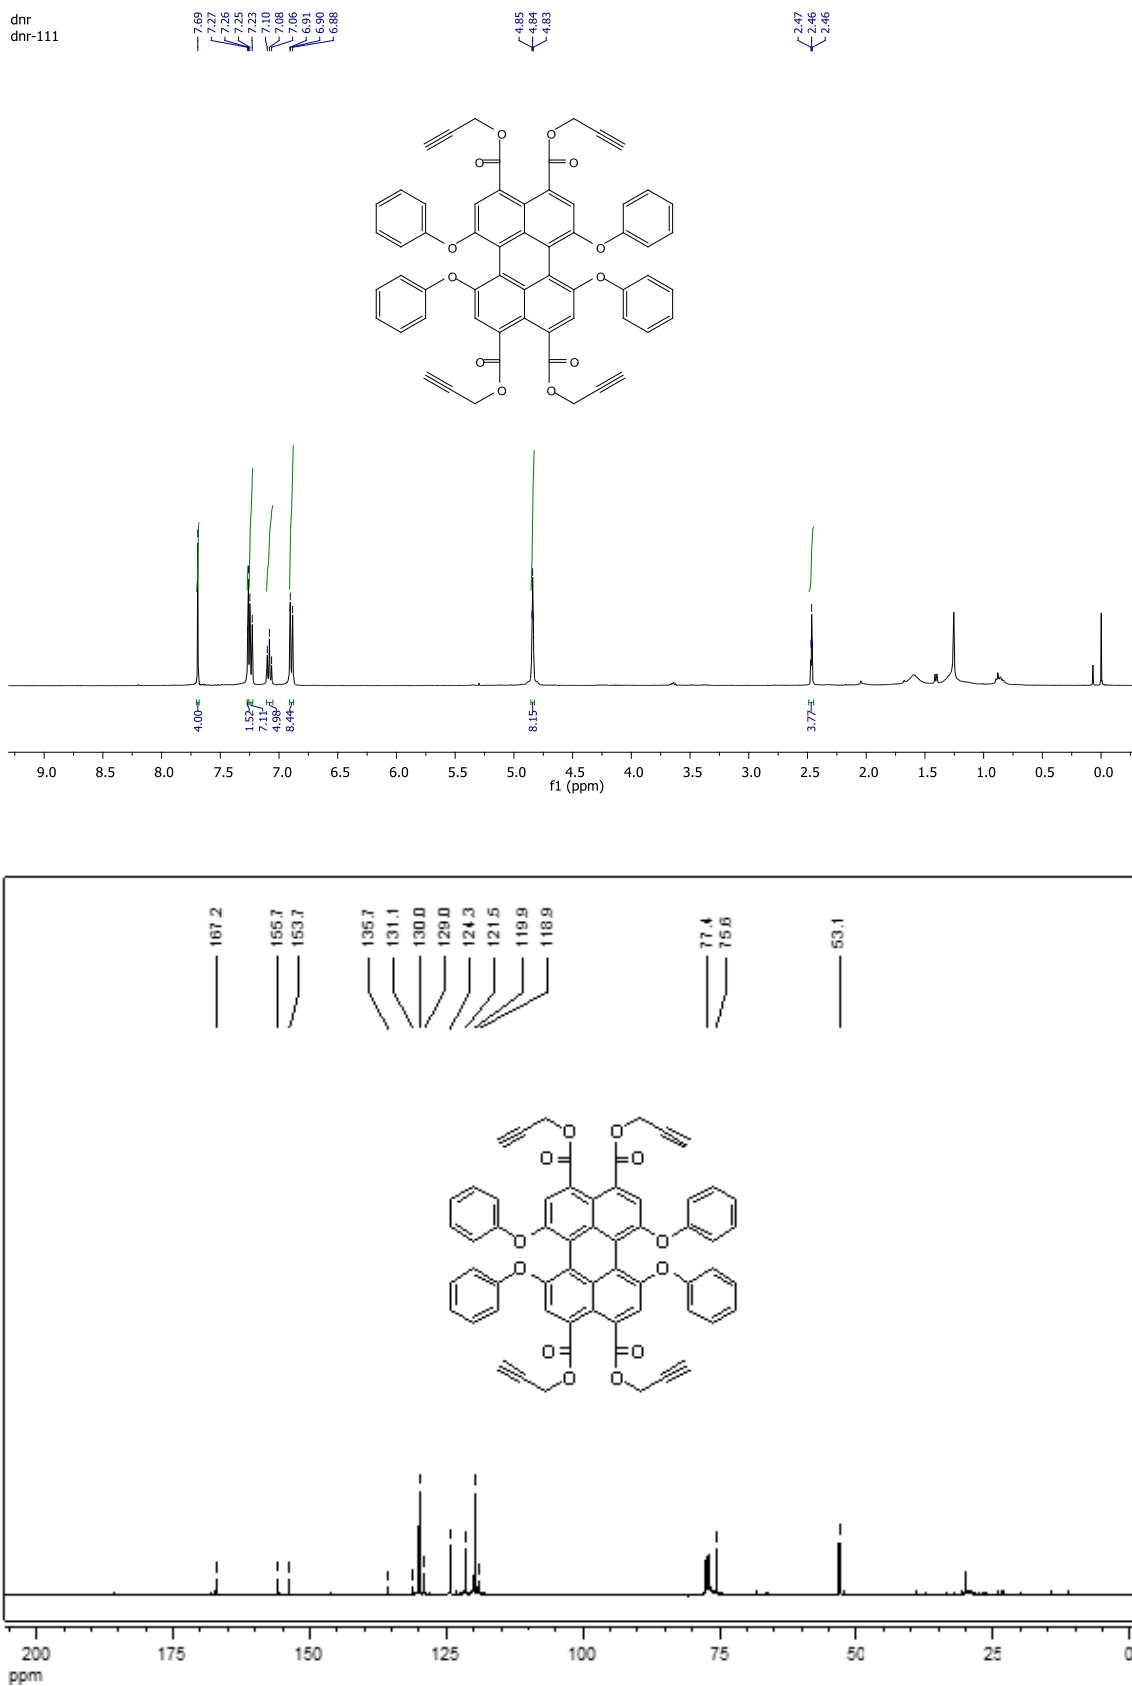

**Fig. S9:**  $^1\text{H}$  and  $^{13}\text{C}$  NMR spectra of compound 8.

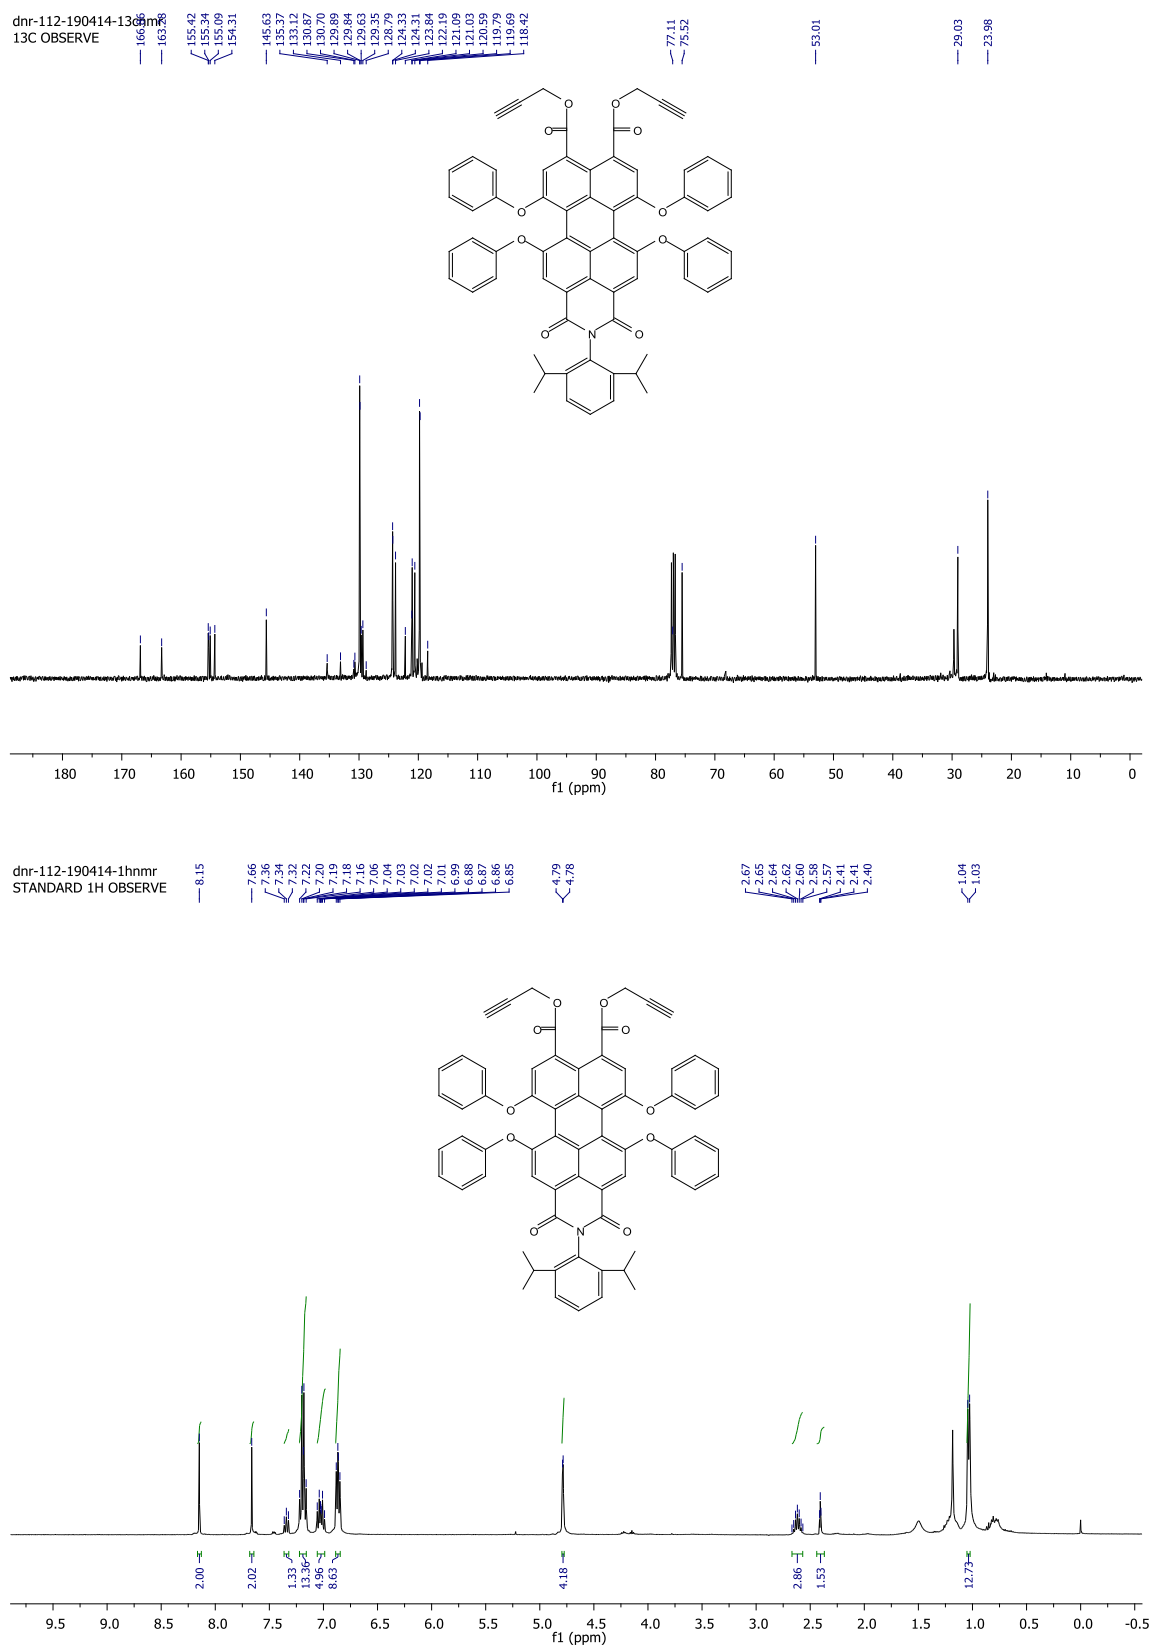

**Fig. S10:** <sup>1</sup>H and <sup>13</sup>C NMR spectra of compound **9**.



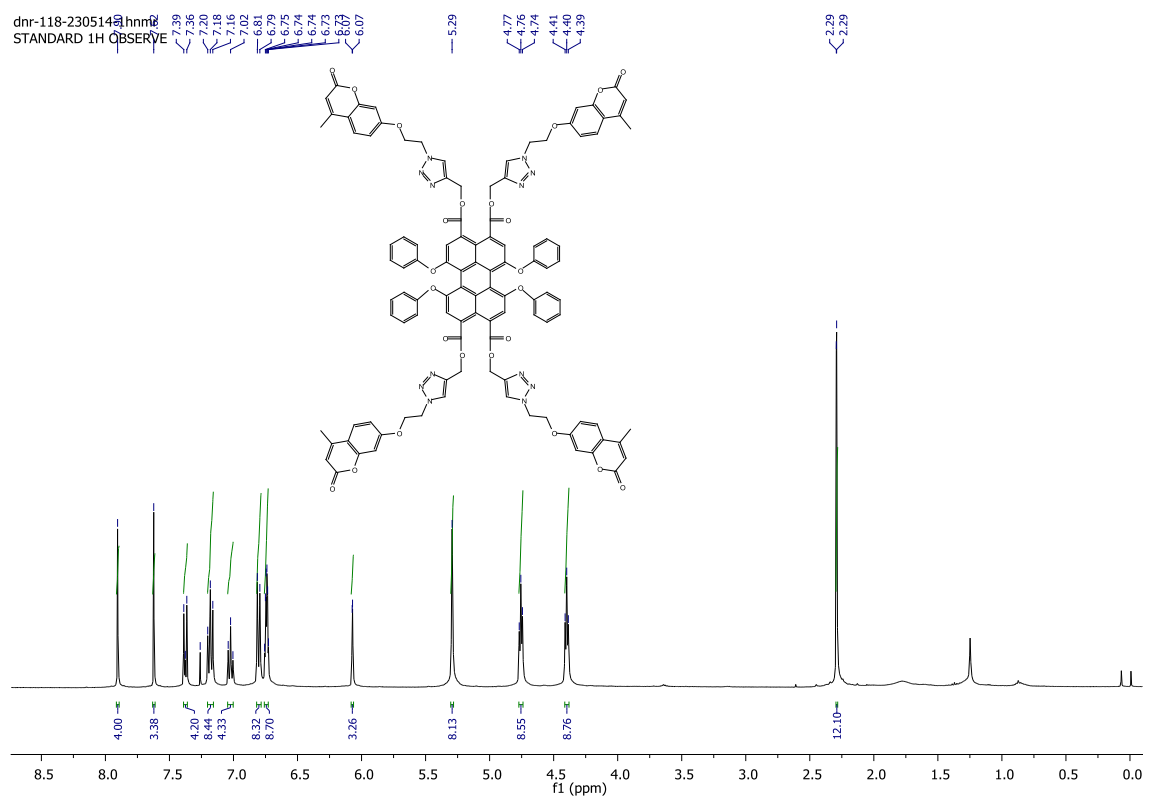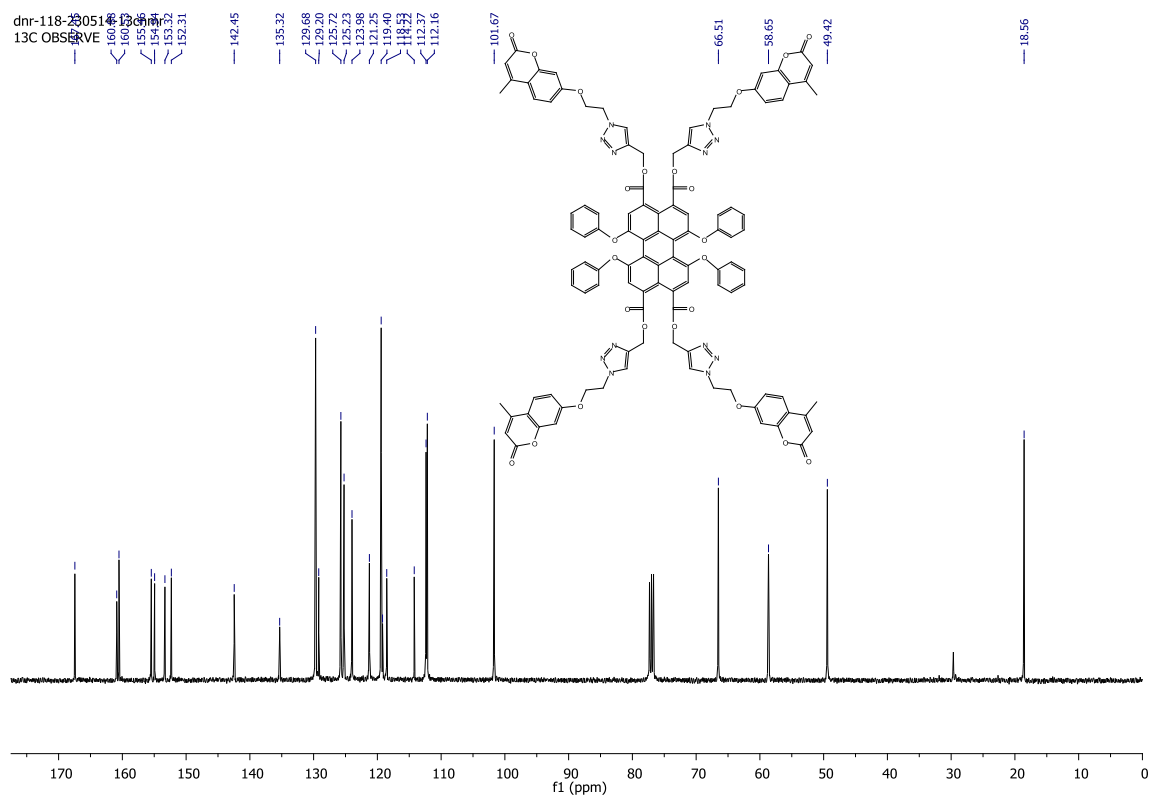

**Fig. S11:**  $^1\text{H}$  and  $^{13}\text{C}$  NMR spectra of **LH-2**.

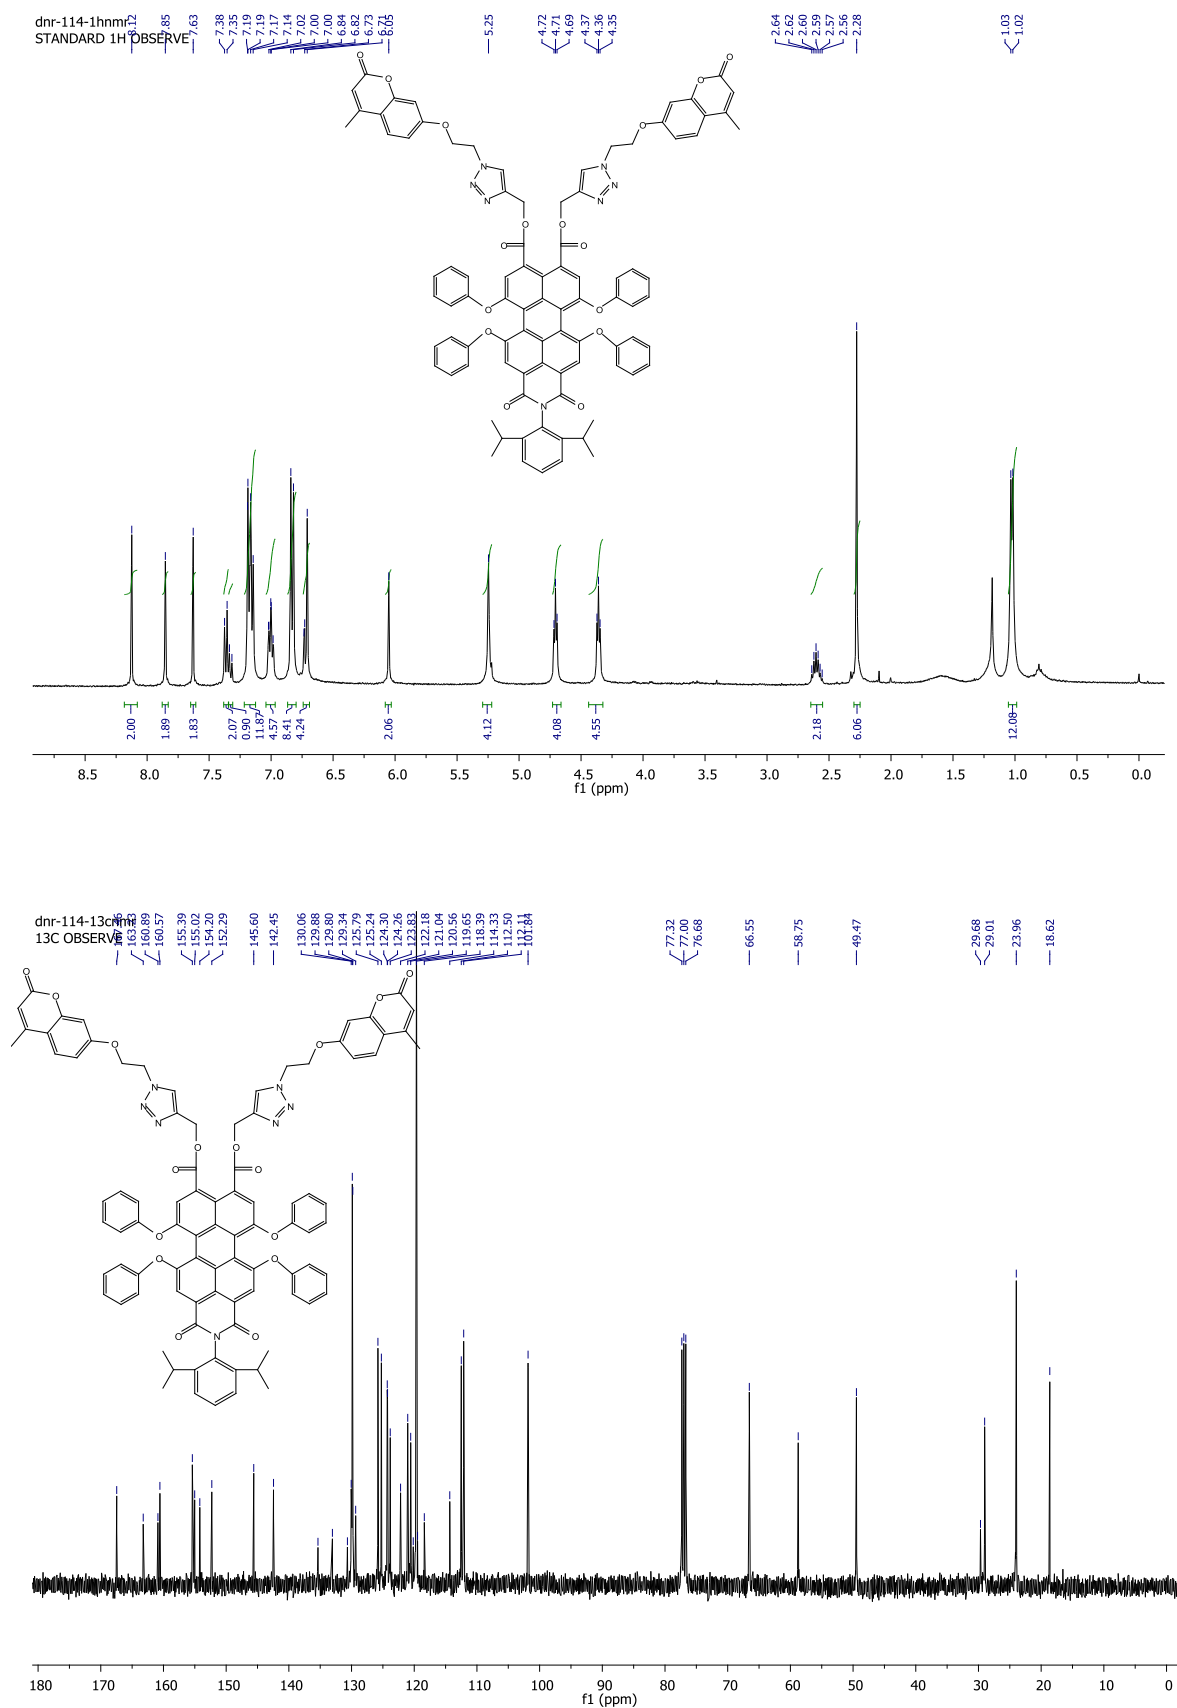

**Fig. S12:** <sup>1</sup>H and <sup>13</sup>C NMR spectra of **LH-3**.

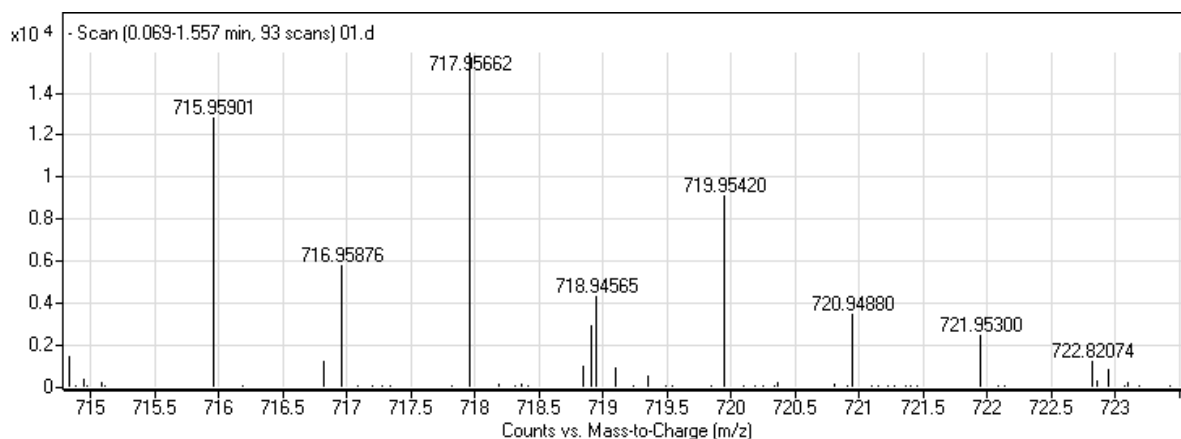

**Fig. S13:** HR-ESI mass spectrum of compound **4**.

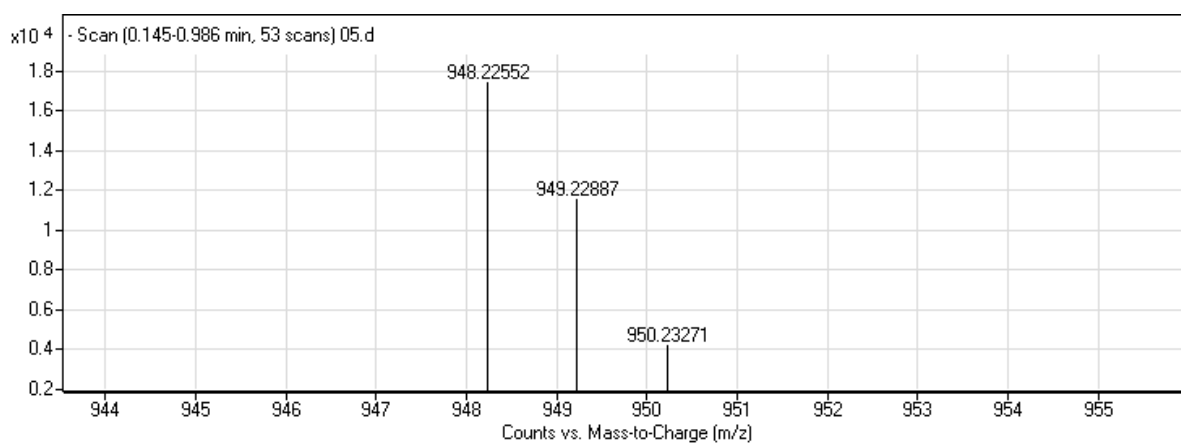

**Fig. S14:** HR-ESI mass spectrum of compound **8**.

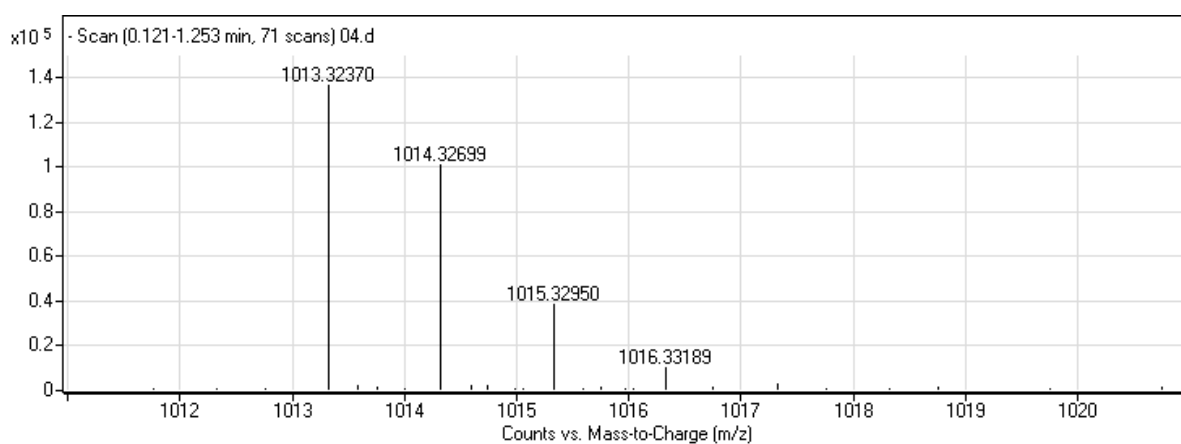

**Fig. S15:** HR-ESI mass spectrum of compound **9**.

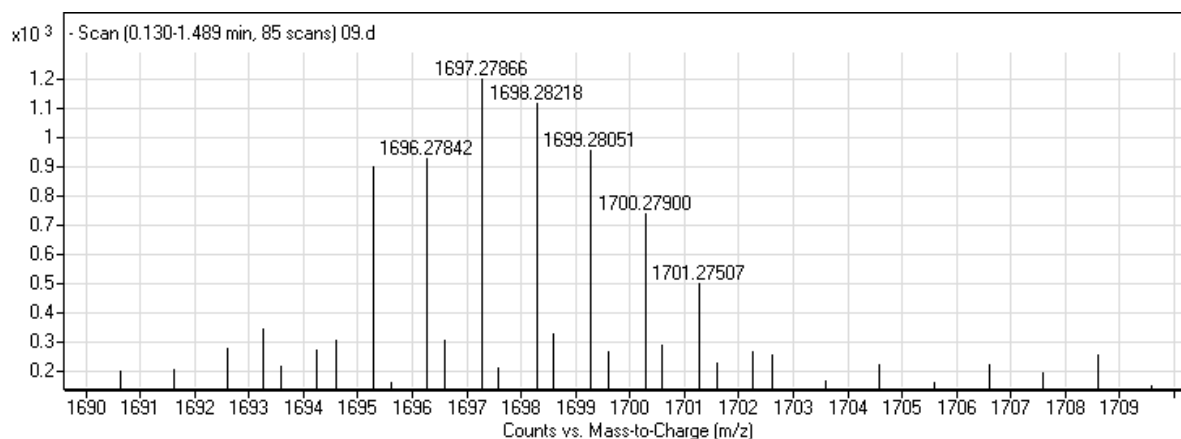

**Fig. S16:** HR-ESI mass spectrum of **LH-1**.

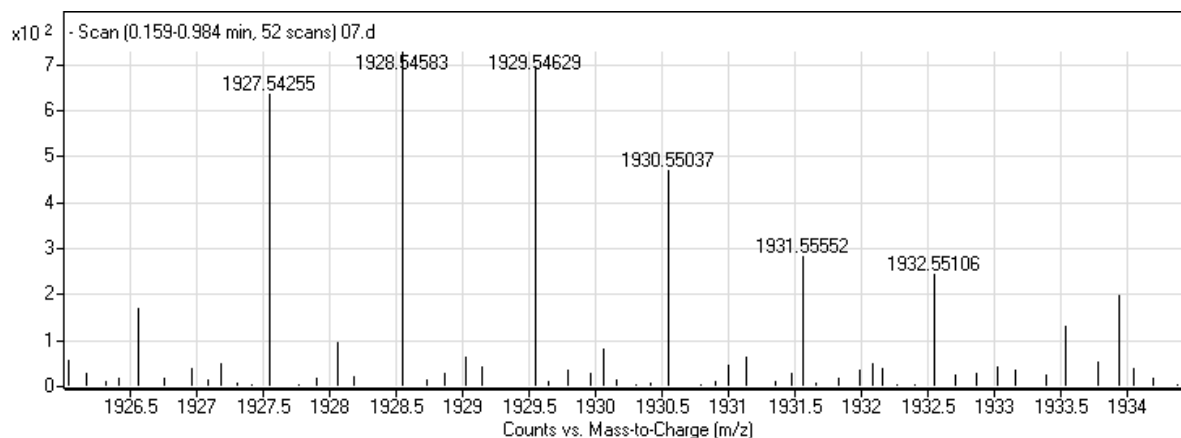

**Fig. S17:** HR-ESI mass spectrum of **LH-2**.

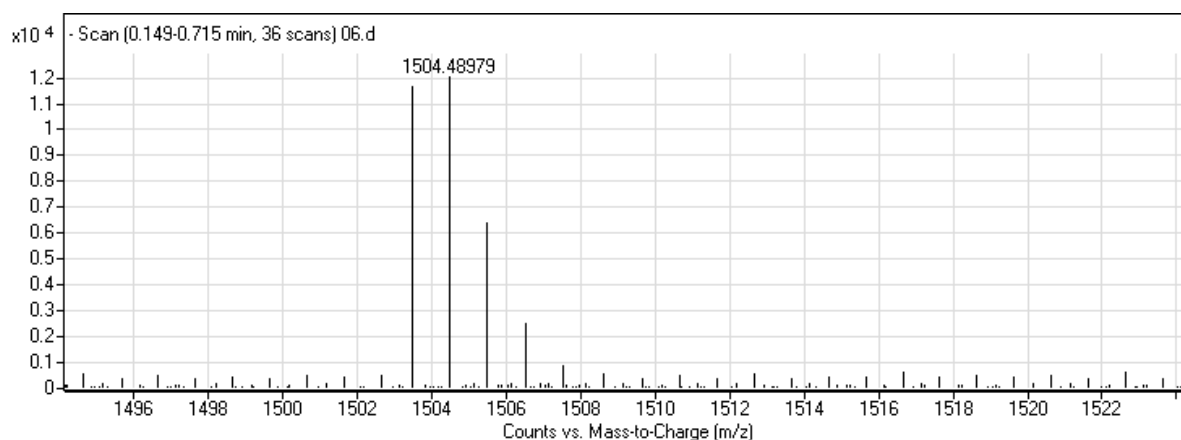

**Fig. S18:** HR-ESI mass spectrum of **LH-3**.

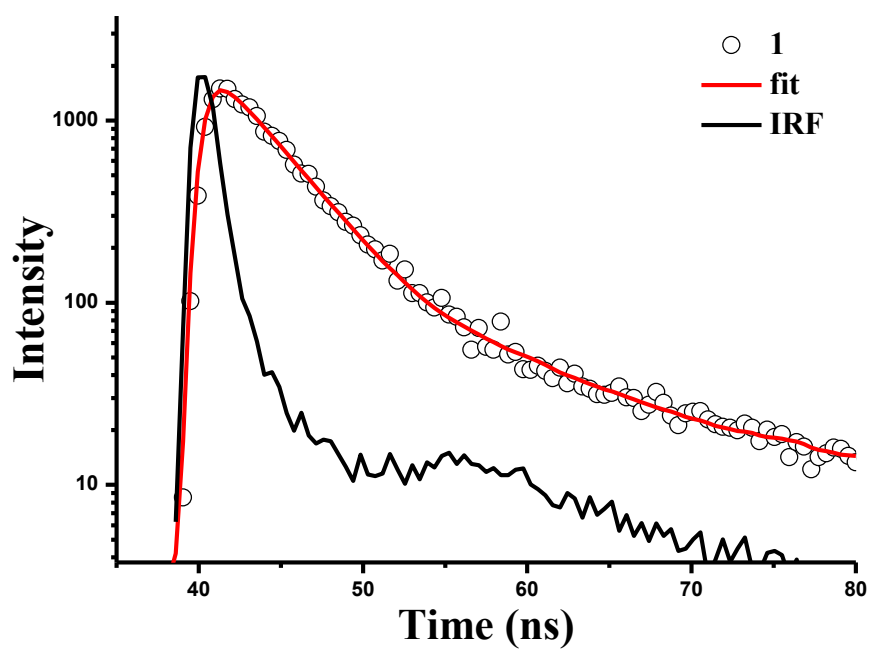

**Fig. S19:** Time-dependent fluorescence decay spectra of **1**. IRF (instrument response function)

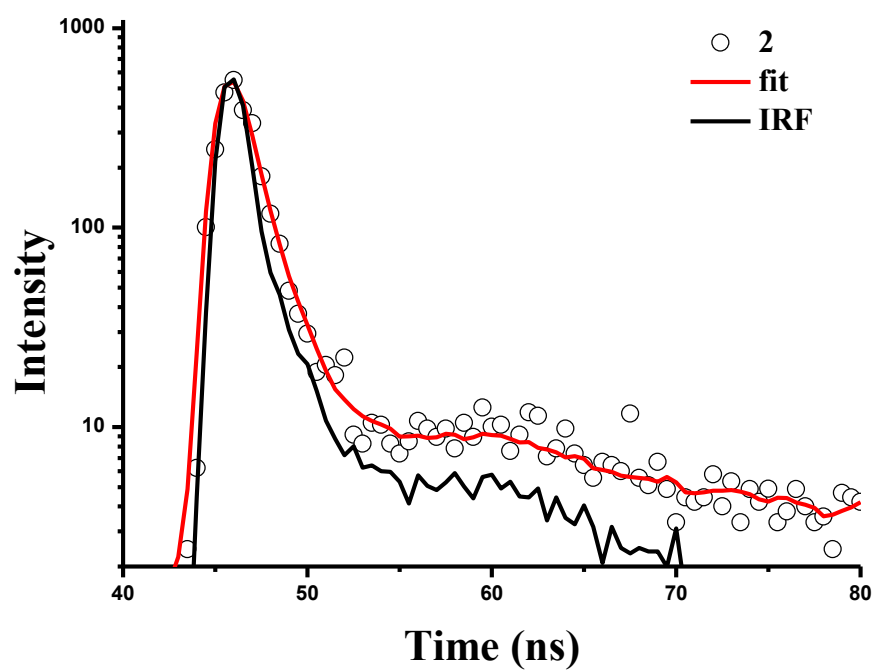

**Fig. S20:** Time-dependent fluorescence decay spectra of **2**. IRF (instrument response function)

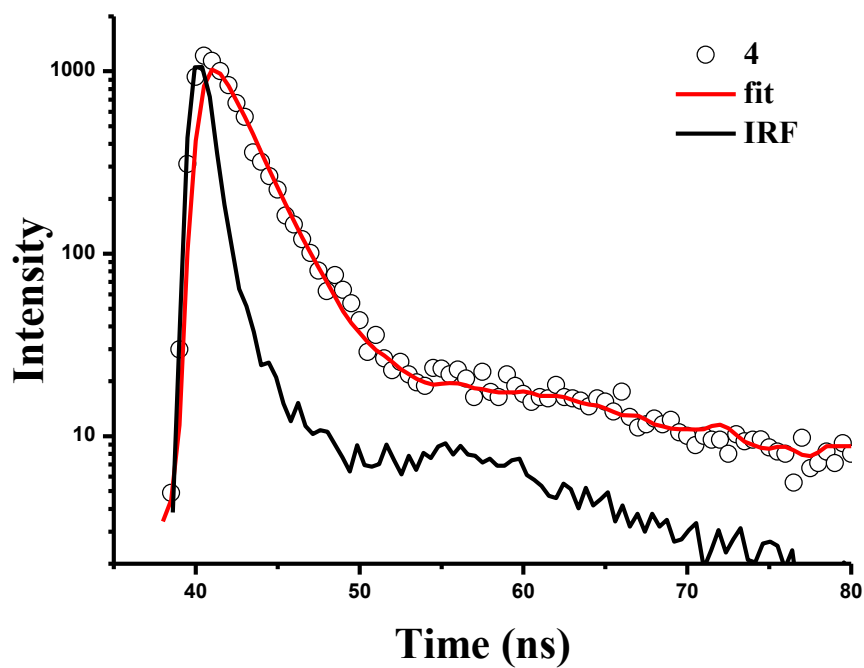

**Fig. S21:** Time-dependent fluorescence decay spectra of **4**. IRF (instrument response function)

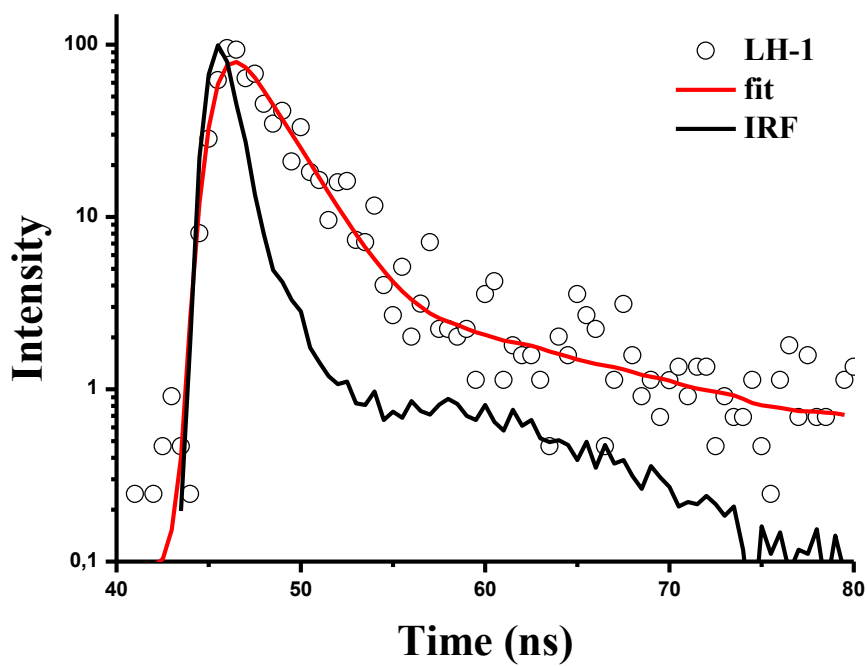

**Fig. S22:** Time-dependent fluorescence decay spectra of **LH-1**. IRF (instrument response function)

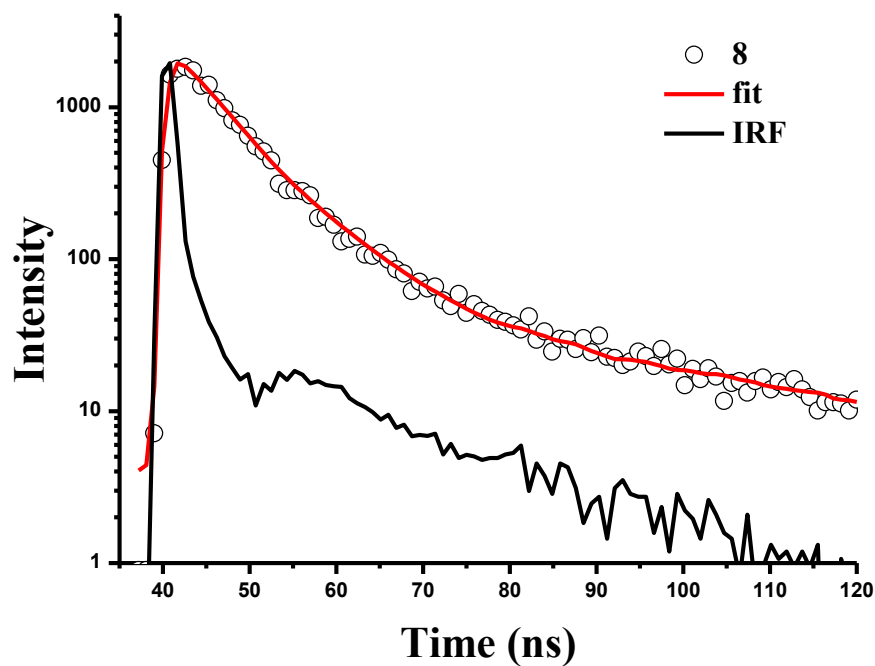

**Fig. S23:** Time-dependent fluorescence decay spectra of **8**. IRF (instrument response function)

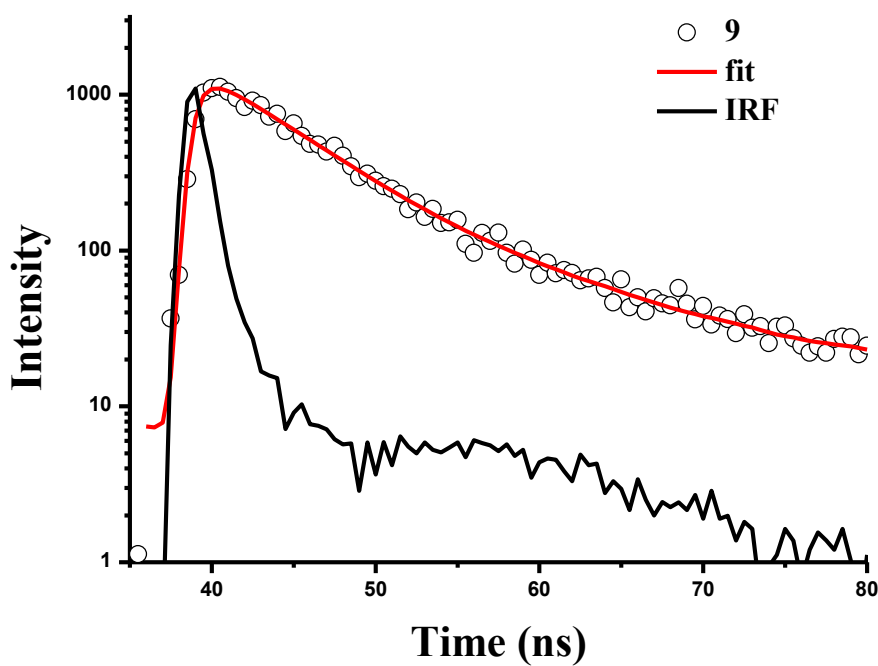

**Fig. S24:** Time-dependent fluorescence decay spectra of **9**. IRF (instrument response function)

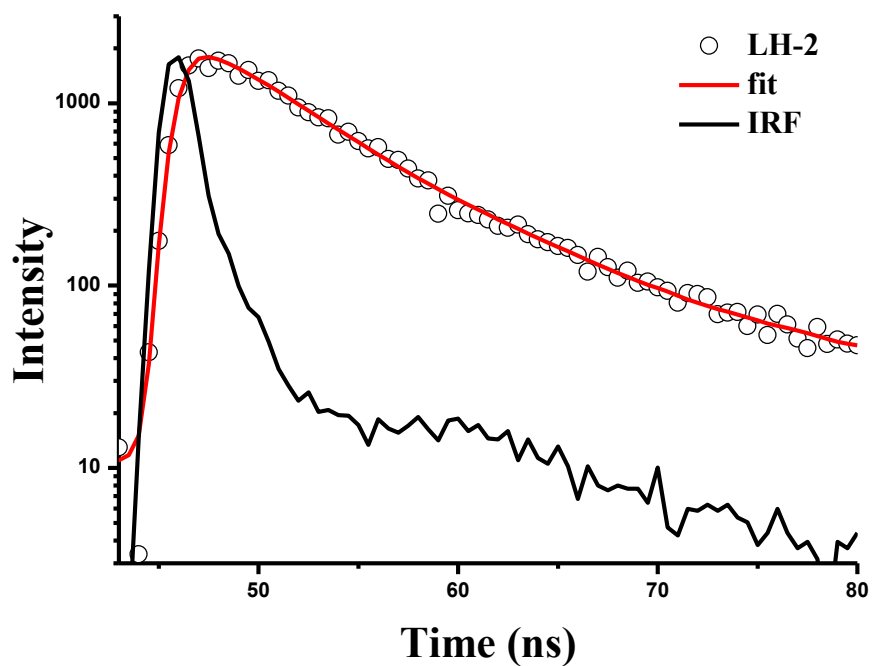

**Fig. S25:** Time-dependent fluorescence decay spectra of **LH-2**. IRF (instrument response function)

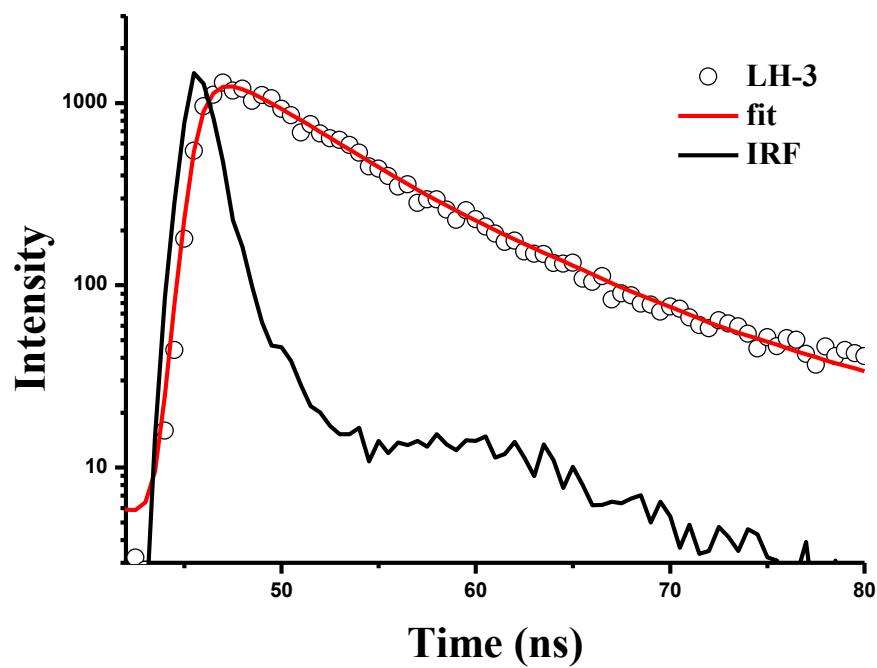

**Fig. S26:** Time-dependent fluorescence decay spectra of **LH-3**. IRF (instrument response function)
